# Supplementary material for: A mycolic acid–specific CD1-restricted T cell population contributes to acute and memory immune responses in human tuberculosis infection
Source: JCI journal article supplement (doi:10.1172/jci46216), 2011-05-16
Supplement: sd1 [file 1]

301 Moved Permanently

# Moved Permanently

The document has moved here.
