# Supplementary material for: A mycolic acid–specific CD1-restricted T cell population contributes to acute and memory immune responses in human tuberculosis infection
Source: JCI journal article supplement (doi:10.1172/jci46216), 2011-05-16
Supplement: sd1 [file 1]

**Supplemental Table 1**

| <b>Patient</b> | <b>MA</b> | <b>Smear results</b> | <b>ESAT-6</b> | <b>CFP-10</b> | <b>Type of TB</b> | <b>Ethnicity</b>       |
|----------------|-----------|----------------------|---------------|---------------|-------------------|------------------------|
| A32            | 0         | +                    | 168           | 18            | Extra-pulmonary   | Mixed European Descent |
| A33            | 0         | n/a                  | 110           | 316           | Extra-pulmonary   | Indian Sub-continent   |
| A57            | 0         | +                    | 32            | 266           | Pulmonary         | Indian Sub-continent   |
| A64            | 0         | n/a                  | 134           | 50            | Extra-pulmonary   | Indian Sub-continent   |
| A62            | 3         | -                    | 342           | 842           | Pulmonary         | Indian Sub-continent   |
| A23            | 4         | n/a                  | 4             | 74            | Extra-pulmonary   | Black African          |
| A56            | 12        | n/a                  | 528           | 240           | Pulmonary         | Indian Sub-continent   |
| A10            | 13        | n/a                  | 32            | 78            | Extra-pulmonary   | Indian Sub-continent   |
| A36            | 13        | n/a                  | 48            | 18            | Pulmonary         | Indian Sub-continent   |
| A14            | 14        | n/a                  | n/a           | n/a           | Pulmonary         | Black African          |
| A24            | 14        | +                    | 58            | 142           | Pulmonary         | Mixed European Descent |
| A47            | 17        | n/a                  | 210           | 212           | Pulmonary         | Mixed European Descent |
| A49            | 20        | n/a                  | 1092          | 308           | Extra-pulmonary   | Indian Sub-continent   |
| A27            | 22        | +                    | 832           | 952           | Pulmonary         | Indian Sub-continent   |
| A51            | 22        | +                    | 58            | 112           | Pulmonary         | Indian Sub-continent   |
| A58            | 23        | -                    | 1136          | 62            | Pulmonary         | Indian Sub-continent   |
| A54            | 25        | +                    | 76            | 144           | Extra-pulmonary   | Indian Sub-continent   |
| A15            | 29        | +                    | n/a           | n/a           | Extra-pulmonary   | Black African          |
| A2             | 31        | n/a                  | 536           | 356           | Extra-pulmonary   | Indian Sub-continent   |
| A16            | 33        | +                    | 464           | 344           | Extra-pulmonary   | Indian Sub-continent   |
| A13            | 39        | +                    | n/a           | n/a           | Pulmonary         | Indian Sub-continent   |
| A55            | 39        | n/a                  | n/a           | n/a           | Extra-pulmonary   | Indian Sub-continent   |
| A17            | 66        | +                    | 136           | 22            | Pulmonary         | Black African          |
| A28            | 69        | n/a                  | 60            | 888           | Extra-pulmonary   | Indian Sub-continent   |
| A63            | 77        | n/a                  | 16            | 16            | Extra-pulmonary   | Black African          |
| A48            | 87        | n/a                  | 790           | 486           | Pulmonary         | Black African          |
| A53            | 102       | n/a                  | 32            | 10            | Extra-pulmonary   | Black African          |
| A60            | 106       | n/a                  | 266           | 542           | Pulmonary         | Indian Sub-continent   |
| A22            | 259       | +                    | 174           | 80            | Pulmonary         | Black African          |
| A52            | 803       | n/a                  | 500           | 372           | Extra-pulmonary   | Black African          |

**Supplemental Table 1. Clinical and immunological characteristics of the individual untreated TB patients from Figure 1 tested at diagnosis for IFN- $\gamma$  MA-specific responses by ex vivo ELISpot.** MA=mycolic acid; n/a=not available. Numbers shown in the MA, ESAT-6 and CFP10 columns represent the number of spot forming cells per  $10^6$  PBLs observed in IFN- $\gamma$  ELISpot.

## Supplemental Figure 1

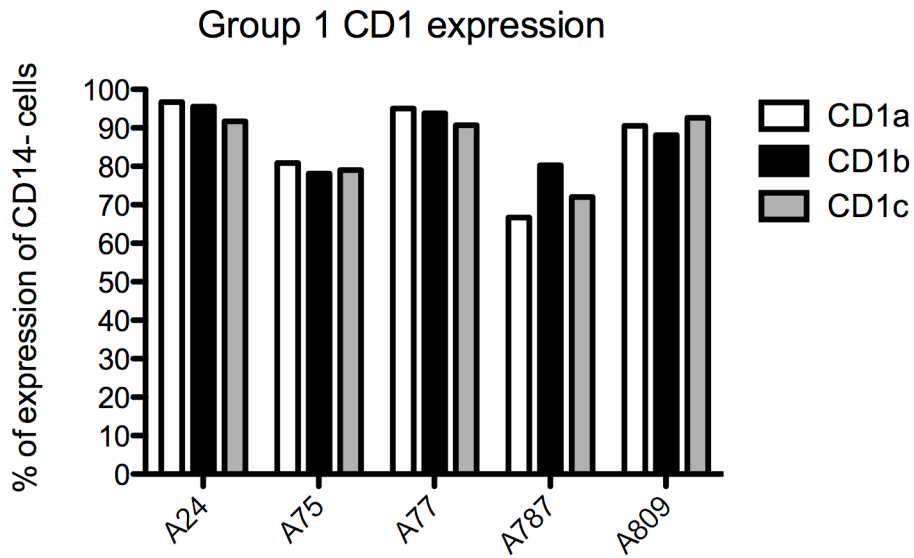

**Supplemental Figure 1. Group 1 CD1 expression on monocyte-derived DCs.** Blood monocytes were grown in the presence of IL-4 and GM-CSF, after 6 days of culture they were stained with anti-CD14, anti-CD86 and anti-CD1a, anti-CD1b or anti-CD1c.

## Supplemental Figure 2

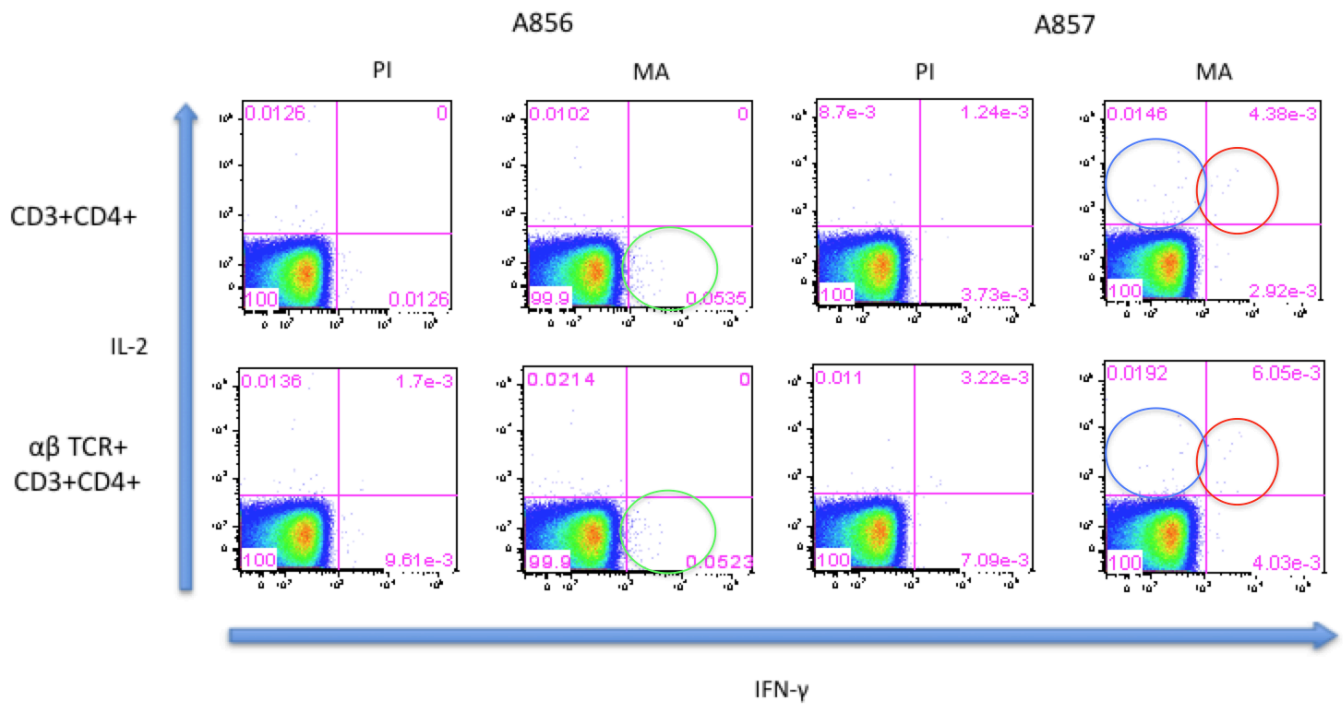

**Supplemental Figure 2. MA-specific responses derive from  $\alpha\beta$ -TCR+CD3+CD4+ cells.** MA-stimulated PBLs from two TB patients were stained with anti-CD3, anti-CD4, anti- $\alpha\beta$  TCR, anti-IFN- $\gamma$  and anti-IL-2 using the cytokine secretion assay. Results are shown from cell populations gated on CD3+CD4+ cells (upper panels) or on CD3+CD4+ $\alpha\beta$ -TCR+ cells (bottom panels).
